# Supplementary material
Source: PubMed Central journal article supplement (PMC3090085)
Supplement: NIHMS252705-supplement-supplement_1.pdf [file NIHMS252705-supplement-supplement_1.pdf]

**Supplemental Table 1.** CYP2C19 and CYP2D6 allele frequencies in white non-Hispanic, white Hispanic, and black groups.

|                   |                 | <b>White Non-Hispanic</b> | <b>White Hispanic</b> | <b>Black</b> |
|-------------------|-----------------|---------------------------|-----------------------|--------------|
|                   |                 | <b>N(%)</b>               | <b>N(%)</b>           | <b>N(%)</b>  |
| <b>CYP2C19</b>    |                 |                           |                       |              |
| Variants          | *1              | 1588(63%)                 | 353(73%)              | 342(59%)     |
|                   | *2              | 333(13%)                  | 61(13%)               | 115(20%)     |
|                   | *3              | 0(0%)                     | 0(0%)                 | 0(0%)        |
|                   | *4              | 10(<1%)                   | 1(<1%)                | 1(<1%)       |
|                   | *6              | 1(<1%)                    | 0(0%)                 | 0(0%)        |
|                   | *8              | 10(<1%)                   | 1(<1%)                | 0(0%)        |
|                   | *17             | 564(23%)                  | 68(14%)               | 120(21%)     |
| <b>CYP2D6</b>     |                 |                           |                       |              |
| Single Variations | *1              | 915(37%)                  | 219(45%)              | 183(31%)     |
|                   | *2A             | 532(21%)                  | 115(24%)              | 44(8%)       |
|                   | *2 (not 2A)     | 20(<1%)                   | 9(2%)                 | 143(24%)     |
|                   | *3              | 39(2%)                    | 4(<1%)                | 2(<1%)       |
|                   | *4              | 483(20%)                  | 59(12%)               | 27(4%)       |
|                   | *5              | 76(3%)                    | 9(2%)                 | 33(6%)       |
|                   | *6              | 28(1%)                    | 6(1%)                 | 3(<1%)       |
|                   | *7              | 1(<1%)                    | 0(0%)                 | 1(<1%)       |
|                   | *9              | 76(3%)                    | 11(2%)                | 3(<1%)       |
|                   | *10             | 43(2%)                    | 8(2%)                 | 22(4%)       |
|                   | *17             | 10(<1%)                   | 9(2%)                 | 83(14%)      |
|                   | *41             | 226(9%)                   | 25(5%)                | 10(2%)       |
| Duplications      | *1 Dup          | 17(<1%)                   | 3(<1%)                | 1(<1%)       |
|                   | *2A Dup         | 18(<1%)                   | 2(0%)                 | 12(2%)       |
|                   | *2 (not 2A) Dup | 1(<1%)                    | 1(<1%)                | 6(1%)        |
|                   | *4 Dup          | 3(<1%)                    | 0(0%)                 | 15(3%)       |
|                   | *6 Dup          | 1(<1%)                    | 0(0%)                 | 0(0%)        |

|  |         |        |       |        |
|--|---------|--------|-------|--------|
|  | *9 Dup  | 1(<1%) | 0(0%) | 0(0%)  |
|  | *17 Dup | 0(0%)  | 0(0%) | 2(<1%) |

**Supplemental Table 2.** Distributions of CYP2C19 and CYP2D6 genotype based categories in ethnic subgroups.

| <b>Genotype Based Categories</b> | <b>White Non-Hispanic</b> | <b>White Hispanic</b> | <b>Black</b> |
|----------------------------------|---------------------------|-----------------------|--------------|
|                                  | <b>N(%)</b>               | <b>N(%)</b>           | <b>N(%)</b>  |
| <b>CYP2C19</b>                   |                           |                       |              |
| Ultra Rapid                      | 60(5%)                    | 4(2%)                 | 10(3%)       |
| Extensive +                      | 368(29%)                  | 51(21%)               | 63(22%)      |
| Extensive                        | 499(40%)                  | 127(52%)              | 107(37%)     |
| Intermediate +                   | 76(6%)                    | 9(4%)                 | 37(13%)      |
| Intermediate                     | 222(18%)                  | 48(20%)               | 65(22%)      |
| Poor                             | 28(2%)                    | 3(1%)                 | 7(2%)        |
| <b>CYP2D6</b>                    |                           |                       |              |
| Ultra Rapid                      | 79(6%)                    | 22(9%)                | 12(4%)       |
| Extensive                        | 449(36%)                  | 107(45%)              | 65(22%)      |
| Intermediate                     | 546(44%)                  | 97(40%)               | 181(62%)     |
| Poor                             | 167(13%)                  | 14(6%)                | 34(12%)      |

**Supplemental Table 3.** CYP2C19 and CYP2D6 allele frequency comparison for white subjects with our genotyping (Mrazek and colleagues) and the Peters analyses.

|                   | Allele       | Allele Frequency (%) |               |
|-------------------|--------------|----------------------|---------------|
|                   |              | Peters et al.        | Mrazek et al. |
| <b>CYP2C19</b>    |              |                      |               |
| Variants          | *1           | 66 †                 | 65 †          |
|                   | *2           | 13                   | 13            |
|                   | *3           | 0                    | 0             |
|                   | *4           | not tested           | <1            |
|                   | *6           | not tested           | <1            |
|                   | *8           | not tested           | <1            |
|                   | *17          | 21                   | 21            |
| <b>CYP2D6</b>     |              |                      |               |
| Single Variations | *1           | 72 †                 | 38 †          |
|                   | *2A          | not tested           | 22            |
|                   | *2 (not 2A)  | not tested           | 1             |
|                   | *3           | 2                    | 1             |
|                   | *4           | 19                   | 18            |
|                   | *5           | 3                    | 3             |
|                   | *6           | 1                    | 1             |
|                   | *7           | 0.03                 | <1            |
|                   | *9           | 3                    | 3             |
|                   | *10          | not tested           | 2             |
|                   | *17          | not tested           | <1            |
|                   | *41          | not tested           | 8             |
|                   | Duplications | *1 Dup               | not tested    |
| *2A Dup           |              | not tested           | <1            |
| *2 (not 2A) Dup   |              | not tested           | <1            |
| *4 Dup            |              | not tested           | <1            |
| *6 Dup            |              | not tested           | <1            |

|  |         |            |    |
|--|---------|------------|----|
|  | *9 Dup  | not tested | <1 |
|  | *17 Dup | not tested | 0  |

† All alleles not tested for were categorized as a \*1.
